# Supplementary material for: Designing BODIPY-based probes for fluorescence imaging of β-amyloid plaques
Source: Royal Society of Chemistry journal article supplement (doi:10.1039/c4ra07754g), 2014-01-01
Supplement: c4ra07754g1.pdf [file c4ra07754g1.pdf]

## SUPPORTING INFORMATION

### Designing Bodipy-Based Probes for Fluorescence Imaging of $\beta$ -amyloid Plaques

Fazli Sozmen,<sup>‡a</sup> Safacan Kolemen,<sup>‡a</sup> Henri-Obadja Kumada,<sup>b</sup> Masahiro Ono,<sup>b</sup> Hideo Saji<sup>b</sup> and Engin U. Akkaya<sup>\*ac</sup>

<sup>a</sup>UNAM-National Nanotechnology Research Center

<sup>b</sup>Department of Patho-Functional Bioanalysis, Graduate School of Pharmaceutical Sciences, Kyoto University, 46-29 Yoshida Shimoadachi-cho, Sakyo-ku, Kyoto 606-8501, Japan.

<sup>c</sup>Department of Chemistry, Bilkent University, 06800 Ankara, Turkey

<sup>‡</sup> These two authors made equal contributions

\*eua@fen.bilkent.edu.tr

#### Contents:

|                                                                           |    |
|---------------------------------------------------------------------------|----|
| 1. <sup>1</sup> H, <sup>13</sup> C NMR and Mass Spectra of Compounds..... | S2 |
|---------------------------------------------------------------------------|----|

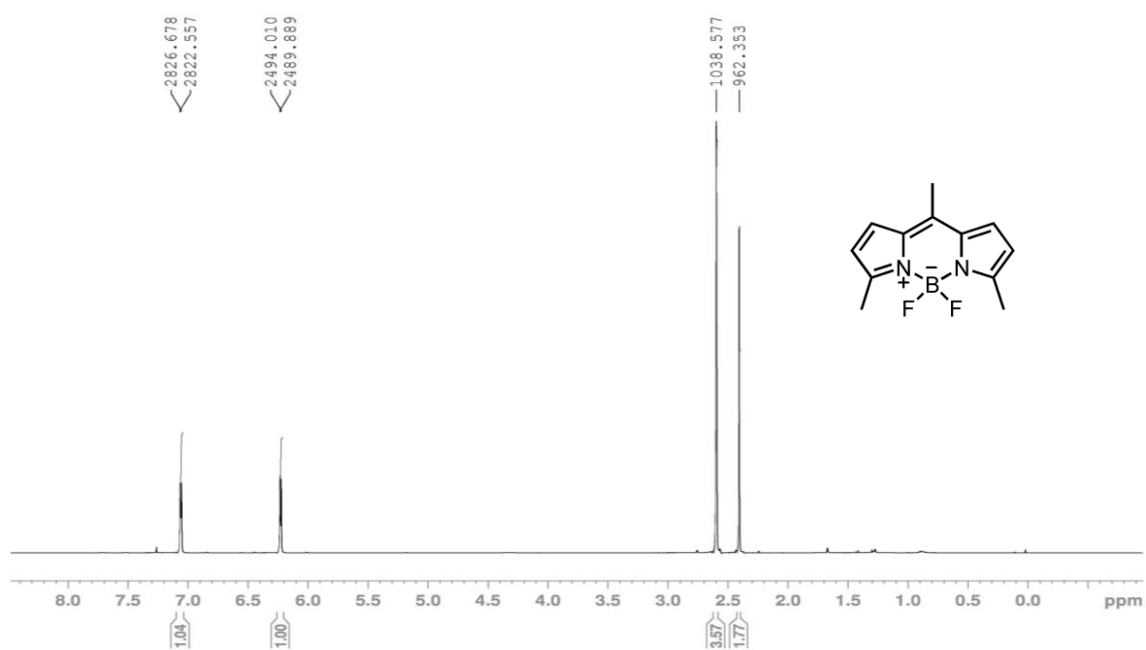

Figure S1:  $^1\text{H}$  NMR spectrum of Compound **1**

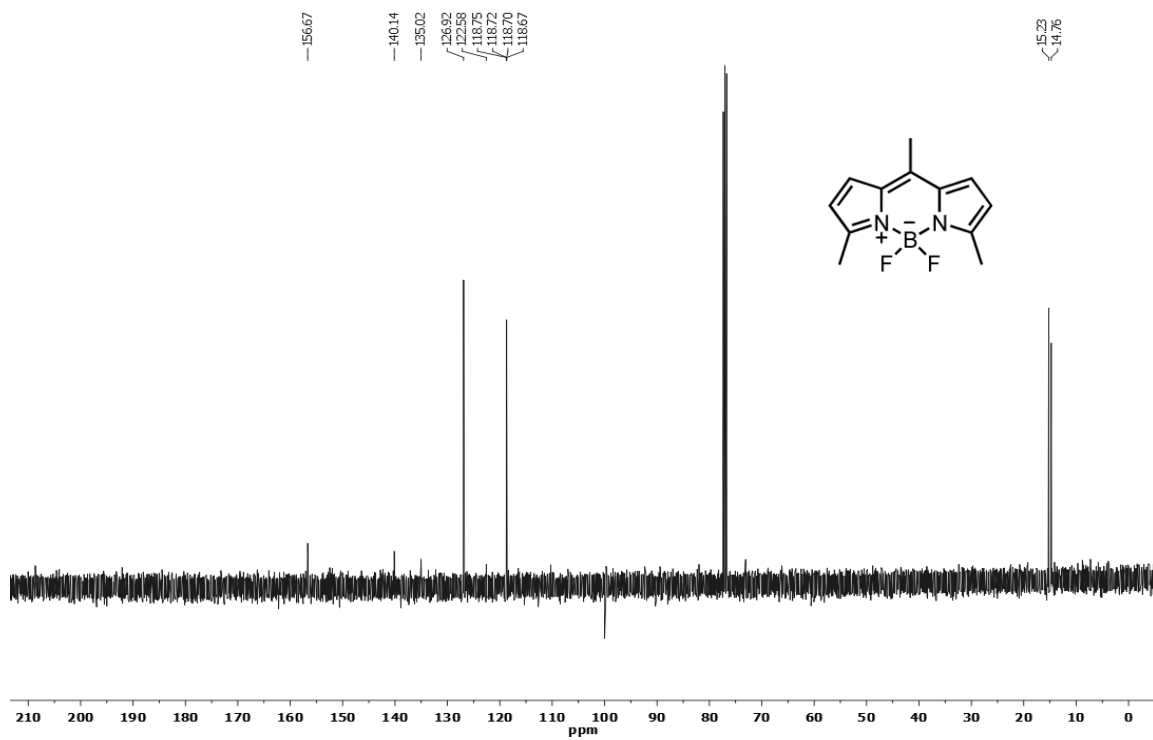

Figure S2:  $^{13}\text{C}$  NMR spectrum of Compound **1**

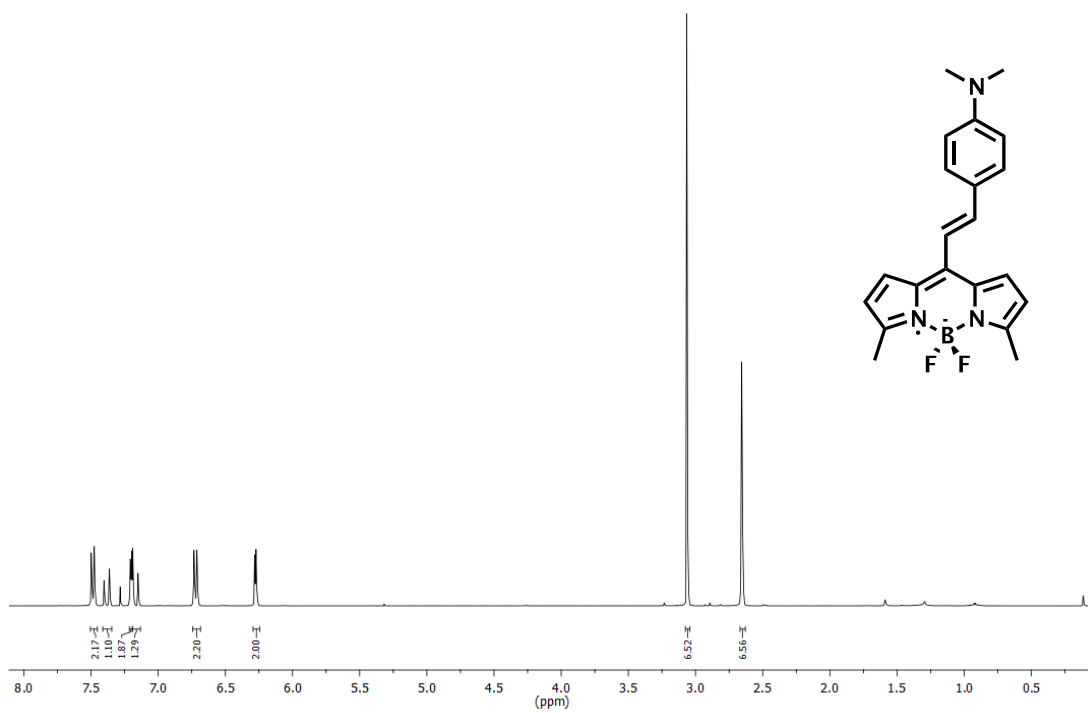

Figure S3:  $^1\text{H}$  NMR spectrum of **EUA-1**

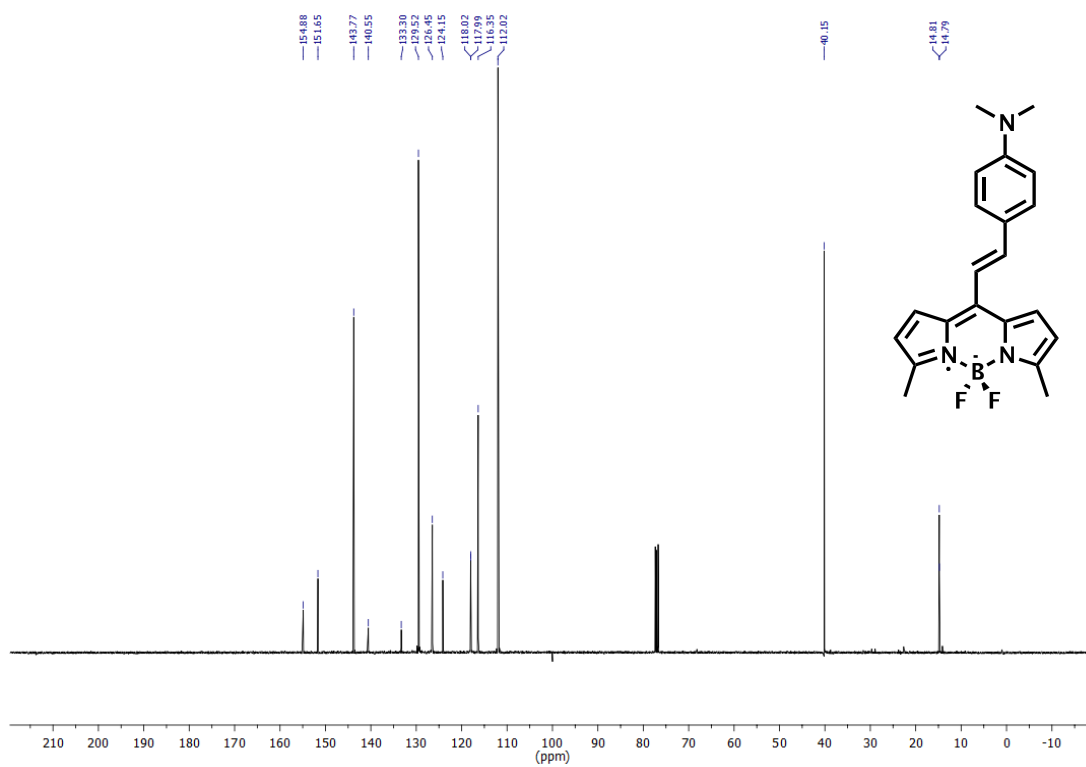

Figure S4:  $^{13}\text{C}$  NMR spectrum of **EUA-1**

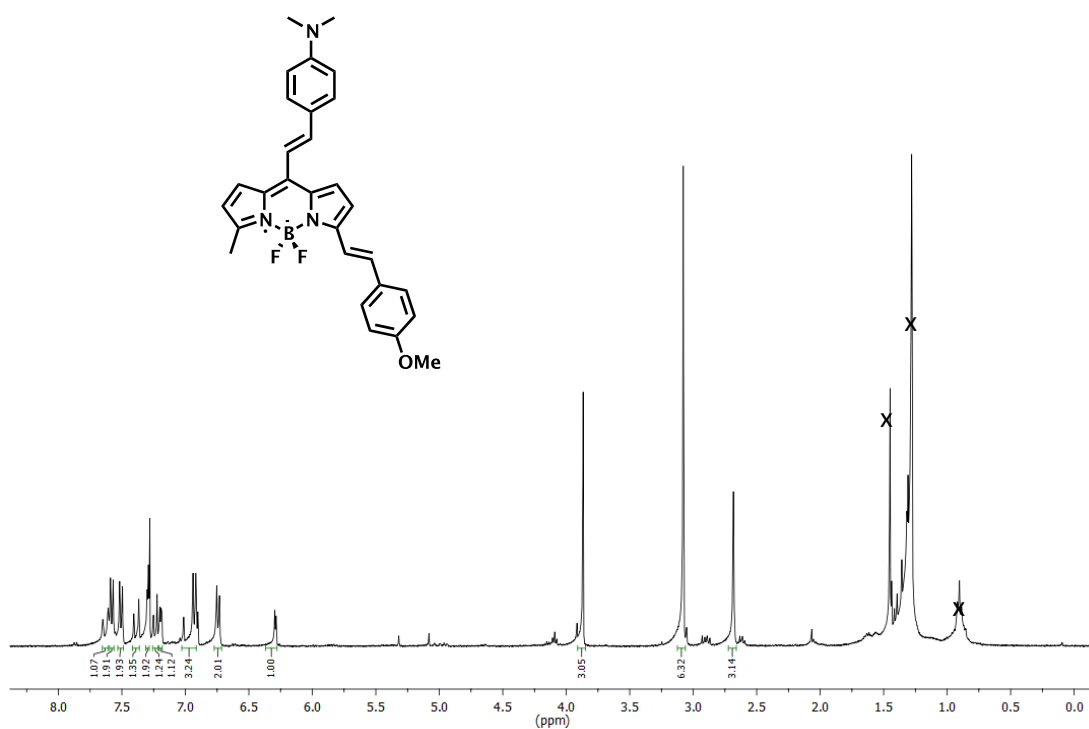

Figure S5: <sup>1</sup>H NMR spectrum of EUA-2

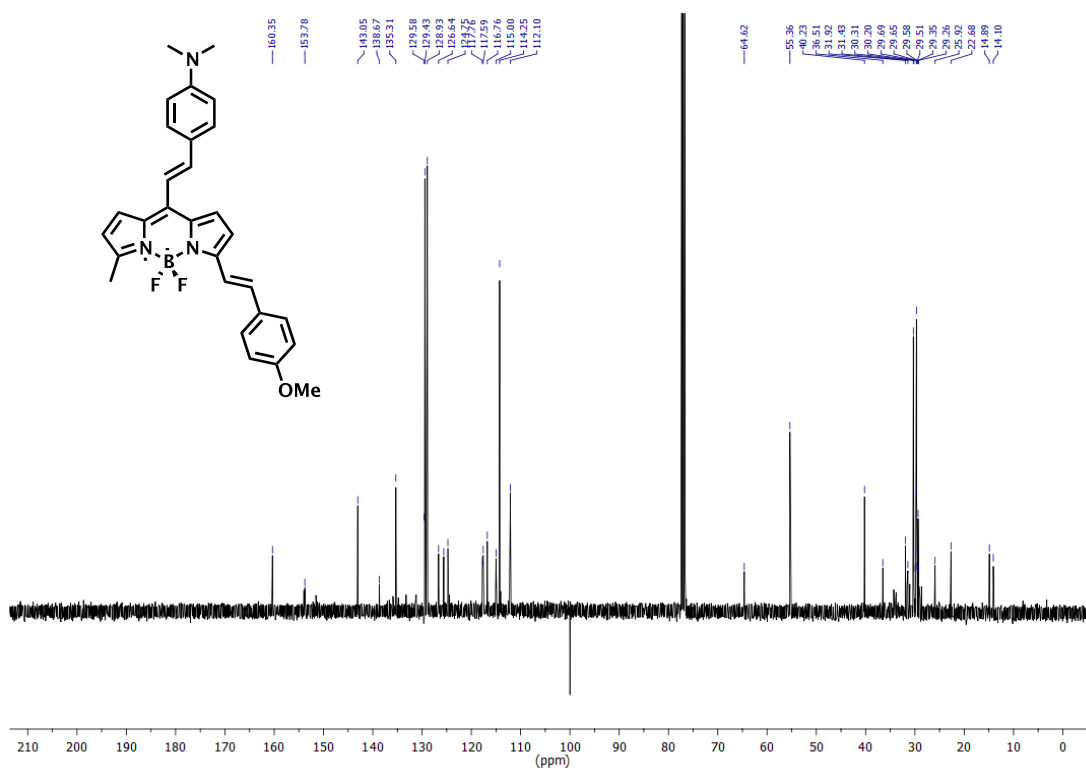

Figure S6: <sup>13</sup>C NMR spectrum of EUA-2

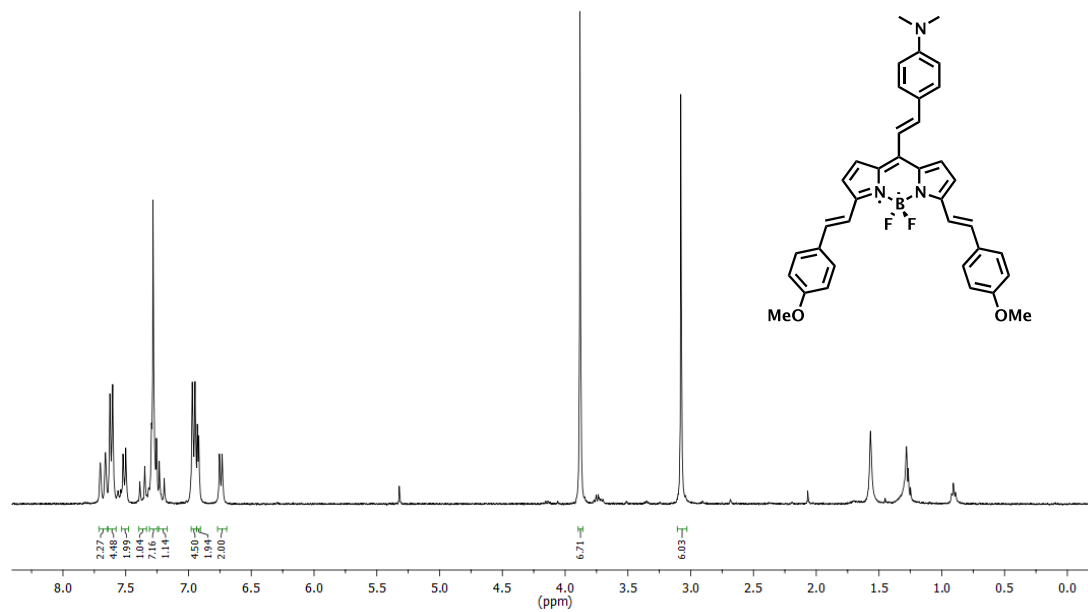

Figure S7:  $^1\text{H}$  NMR spectrum of EUA-3

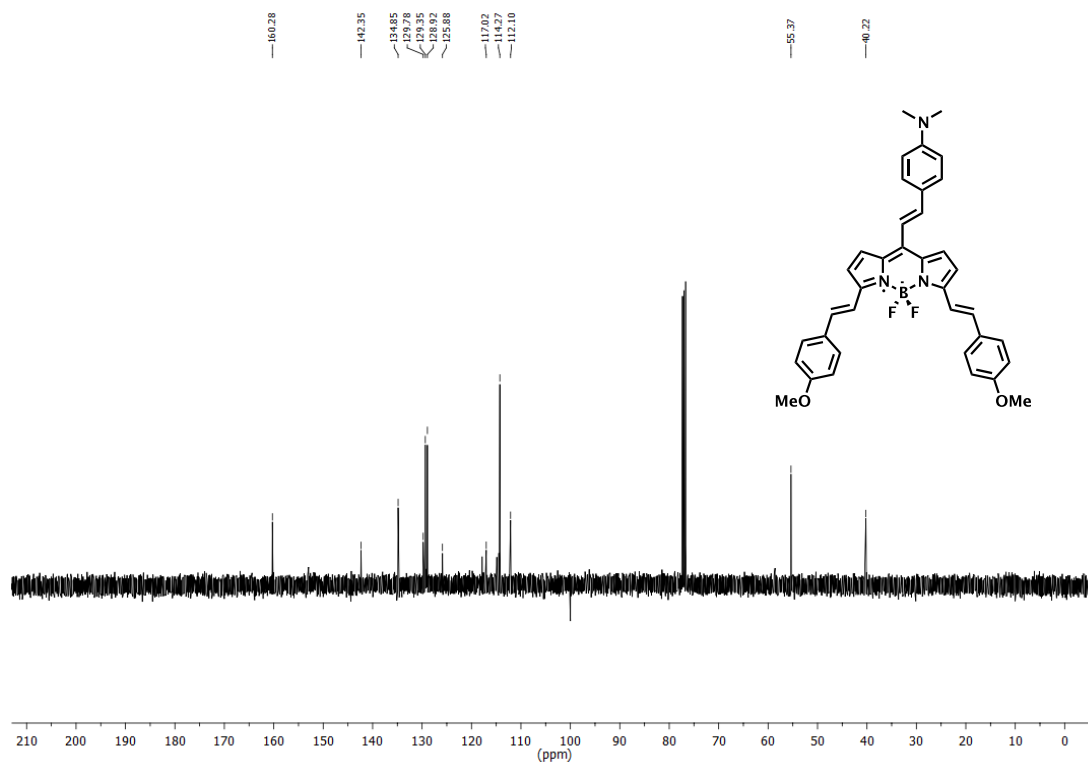

Figure S8:  $^{13}\text{C}$  NMR spectrum of EUA-3

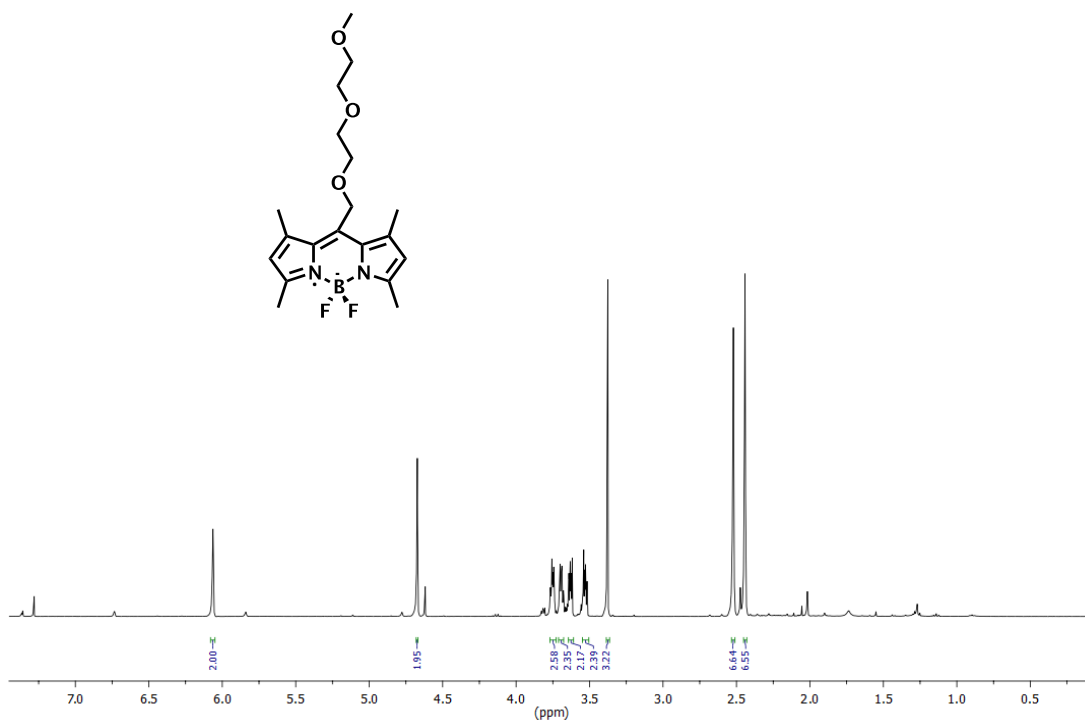

Figure S9:  $^1\text{H}$  NMR spectrum of Compound 3

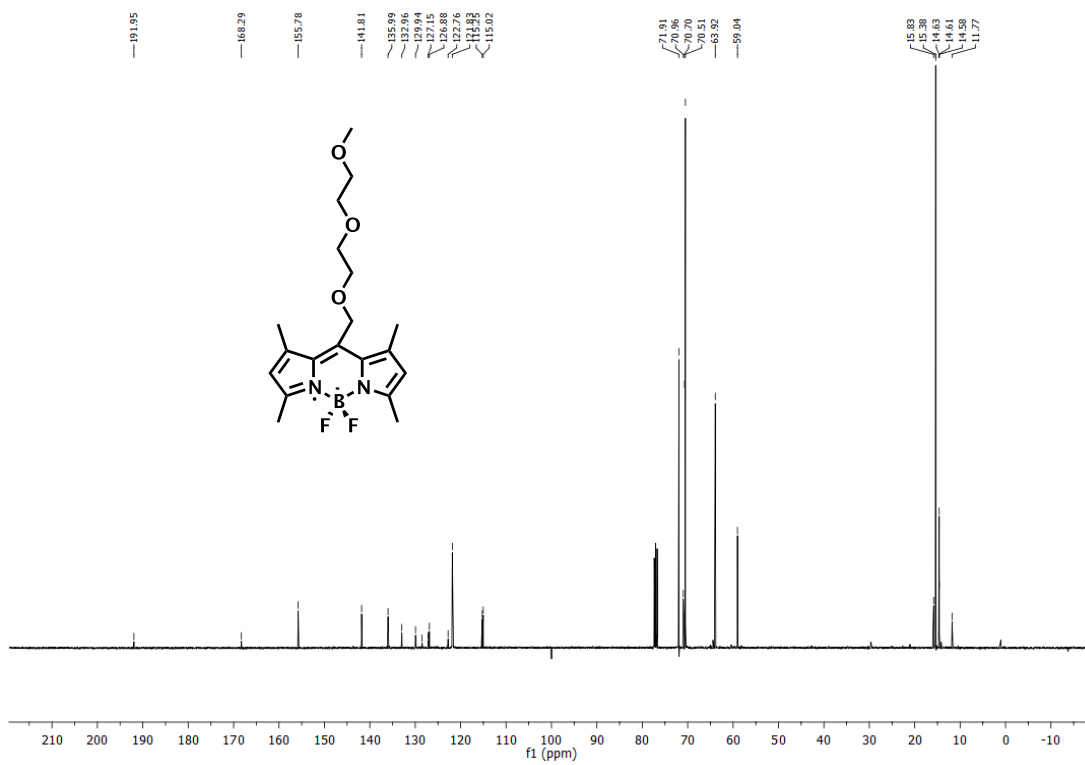

Figure S10:  $^{13}\text{C}$  NMR spectrum of Compound 3

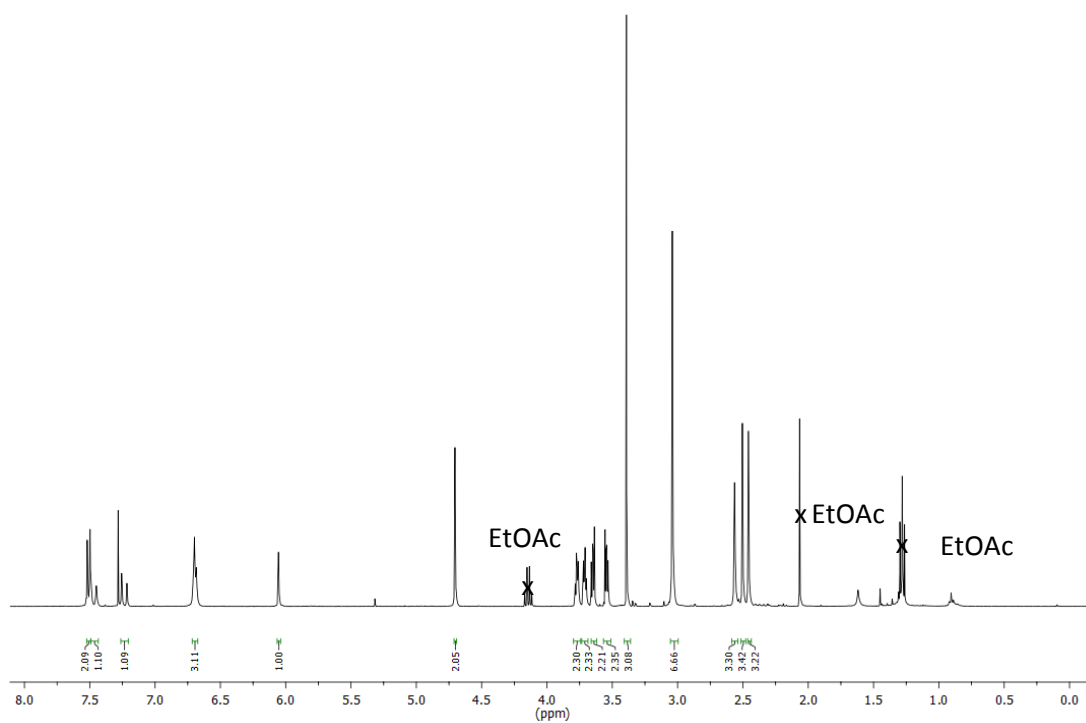

Figure S11:  $^1\text{H}$  NMR spectrum of **EUA-4**

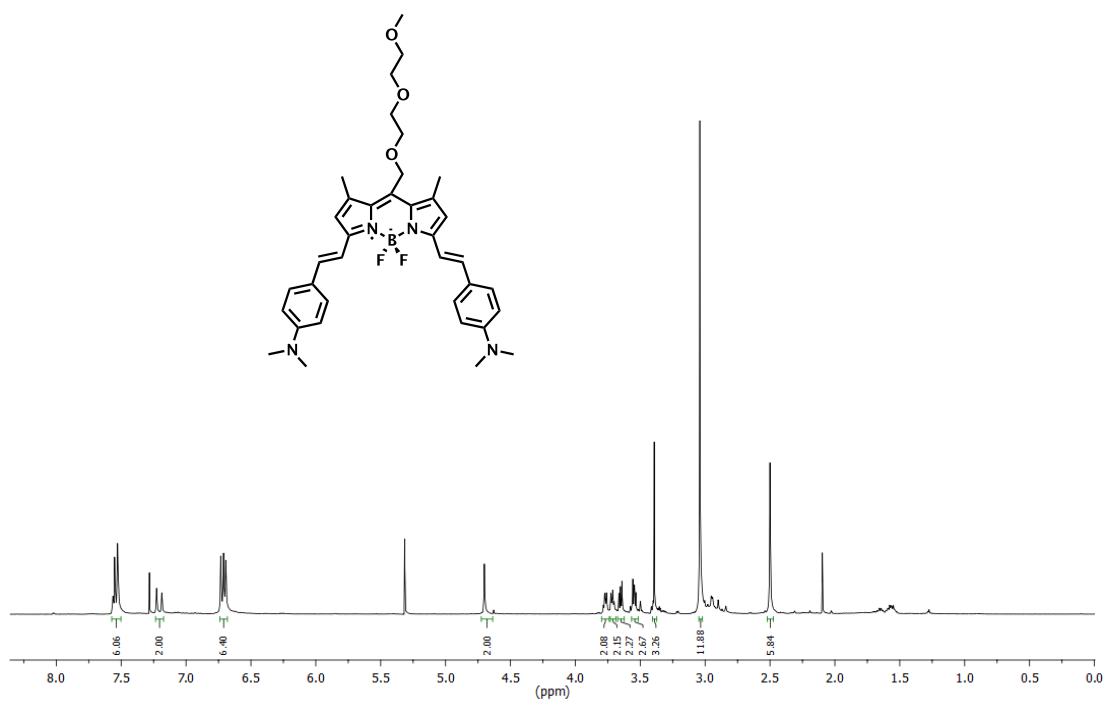

Figure S12:  $^1\text{H}$  NMR spectrum of **EUA-5**

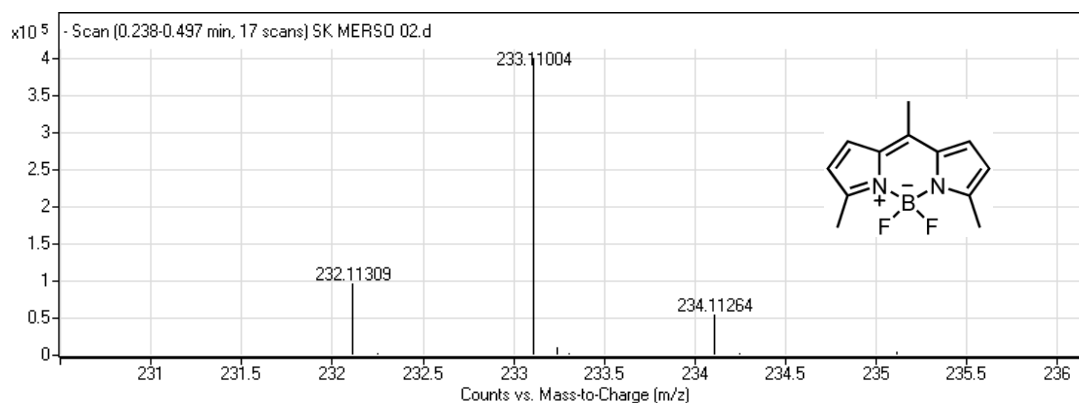

Figure S13: Mass spectrum of Compound 1

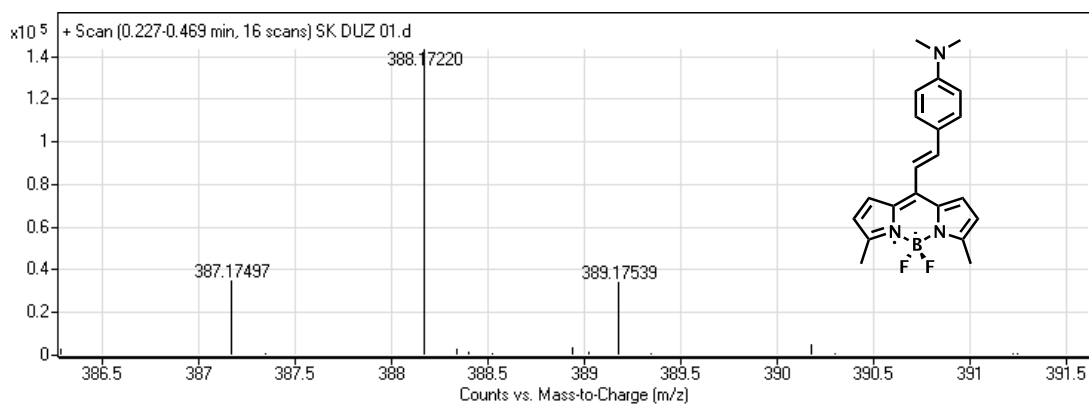

Figure S14: Mass spectrum of EUA-1

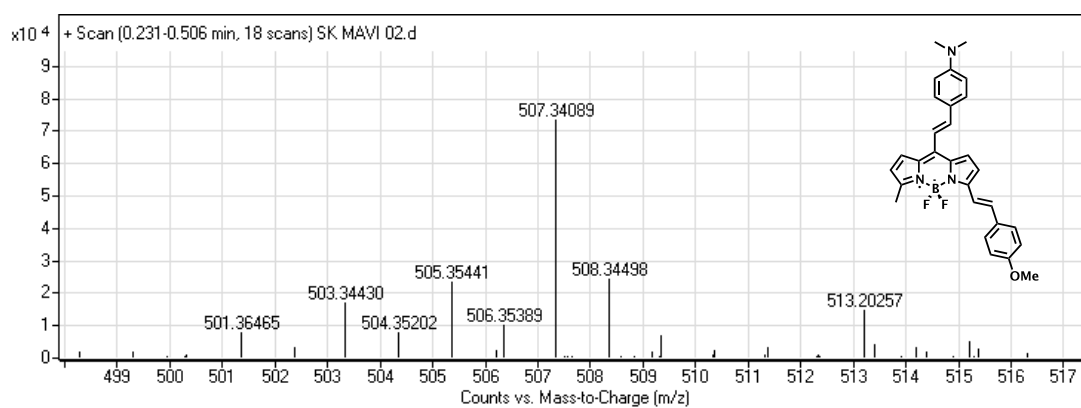

Figure S15: Mass spectrum of EUA-2



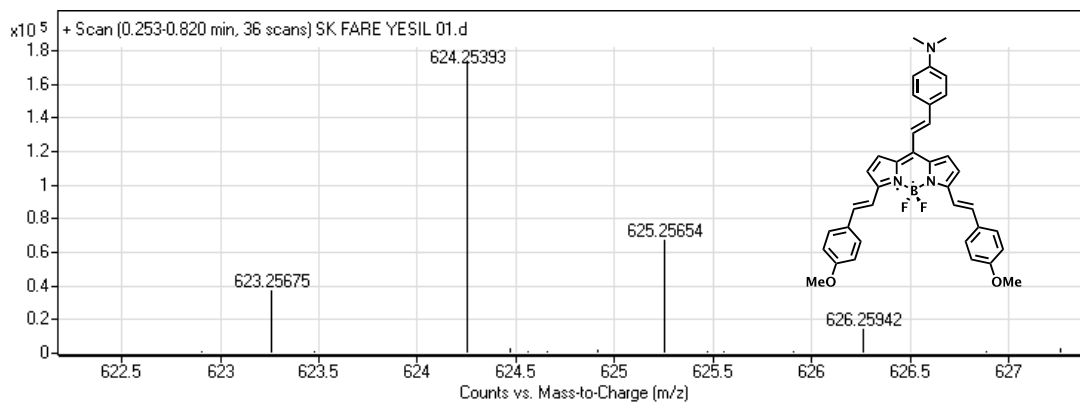

Figure S16: Mass spectrum of **EUA-3**

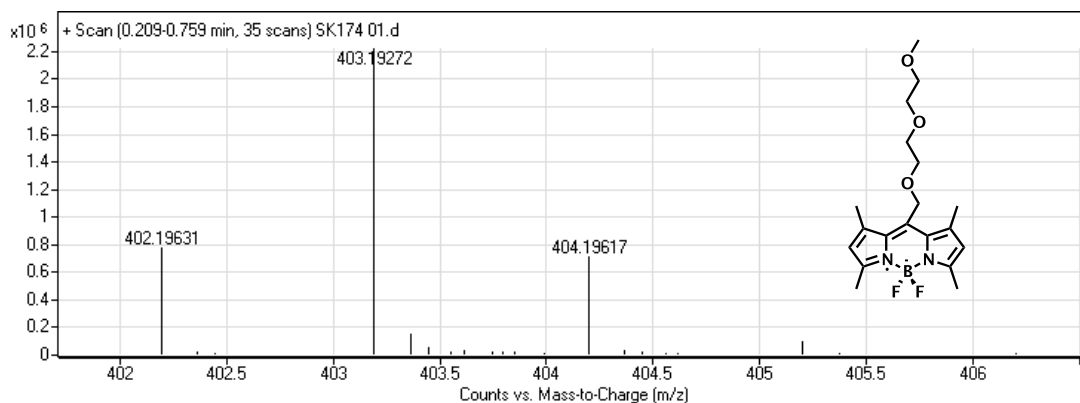

Figure S17: Mass spectrum of **Compound 3**

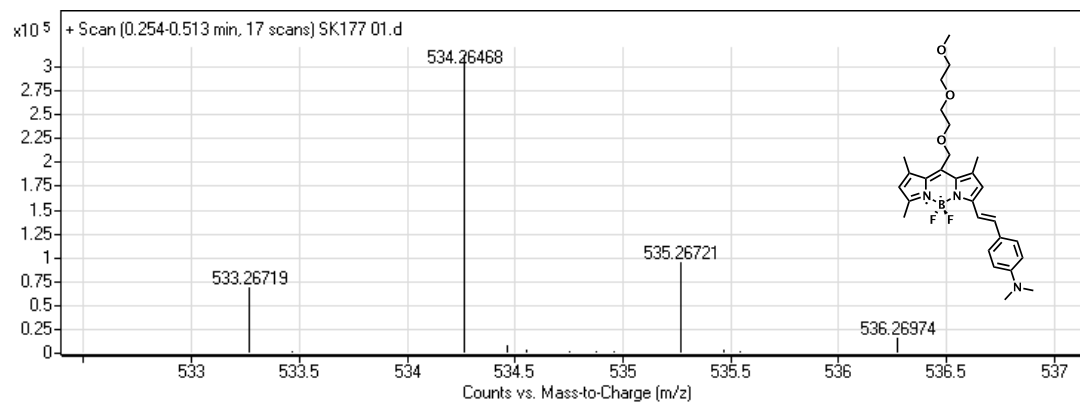

Figure S18: Mass spectrum of **EUA-4**

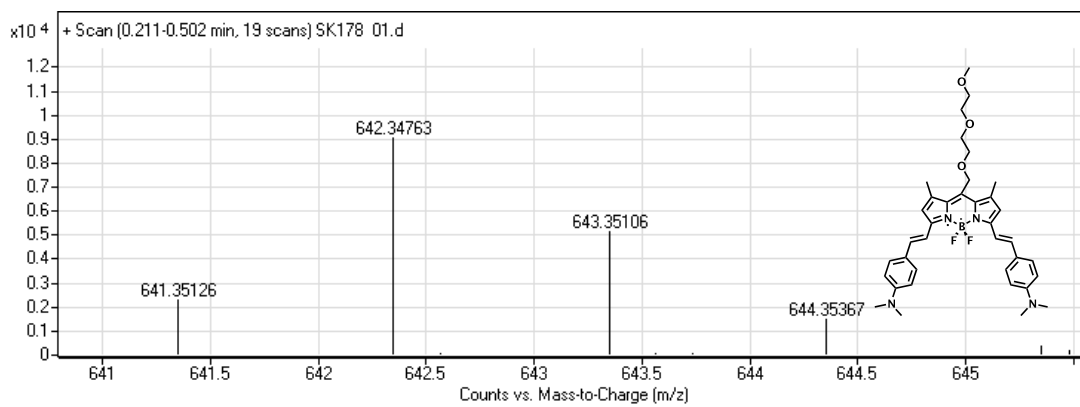

Figure S19: Mass spectrum of **EUA-5**

## Measurement and calculation of log P of the probe compounds with HPLC

Column: Cosmosil 5C18-MS-II Waters 4.6x150mm (Nacalai)

Wavelength: 254nm

Mobile phase: MeOH:0.04M Britton-Robinson buffer=5:2 (pH=7.5)

Britton-Robinson buffer: boric acid, acetic acid, phosphate (each 0.04M)

Standards:

$t_0$  confirmation solution: NaNO<sub>3</sub> 1g/ 50ml H<sub>2</sub>O (1)

Benzene 10mg/ 20ml acetonitrile (2)

Bromobenzene 10mg/ 20ml acetonitrile (3)

Hexachlorobenzen 10mg/ 20ml acetonitrile (4)

Biphenyl 10ml/ 50 ml acetonitrile (5)

(5) 5 ml/ 50 ml acetonitrile (5)'

samples:

(1) 1ml, (2)or(3)or(4) 2ml, acetonitrile 7ml (total 10 ml)

(1) 1ml, (5)' 1ml, acetonitrile 8ml (total 10 ml)

(1) 10 ul, 1mM EUA(1-5) 20 ul, acetonitrile 80 ul (total 100ul)

Inject quantity for HPLC: 25 ul

Table. 1 Retention Times and logPow of Standard Reagents

|                   | $t_0$ (min) | $t_R$ (min) | $k'(t_R-t_0/t_0)$ (min) | logk'   | logPow  |
|-------------------|-------------|-------------|-------------------------|---------|---------|
| Benzene           | 3.233       | 9.6         | 1.969                   | 0.294   | 2.13    |
| Bromobenzen       | 3.251       | 15.709      | 4.832                   | 0.684   | 2.99    |
| Biphenyl          | 3.231       | 33.834      | 9.472                   | 0.976   | 3.76    |
| Hexachlorobenzene | 3.195       | 92.301      | 27.889                  | 1.445   | 6.18    |
|                   | (measured)  | (measured)  | (calculated)            | (calc.) | (known) |

$t_0$ : retention time of NaNO<sub>3</sub>

$t_R$ : retention time of each compounds

$k'$ : capacity factor

$(t_R-t_0)/t_0$

logk': natural logarithm of  $k'$

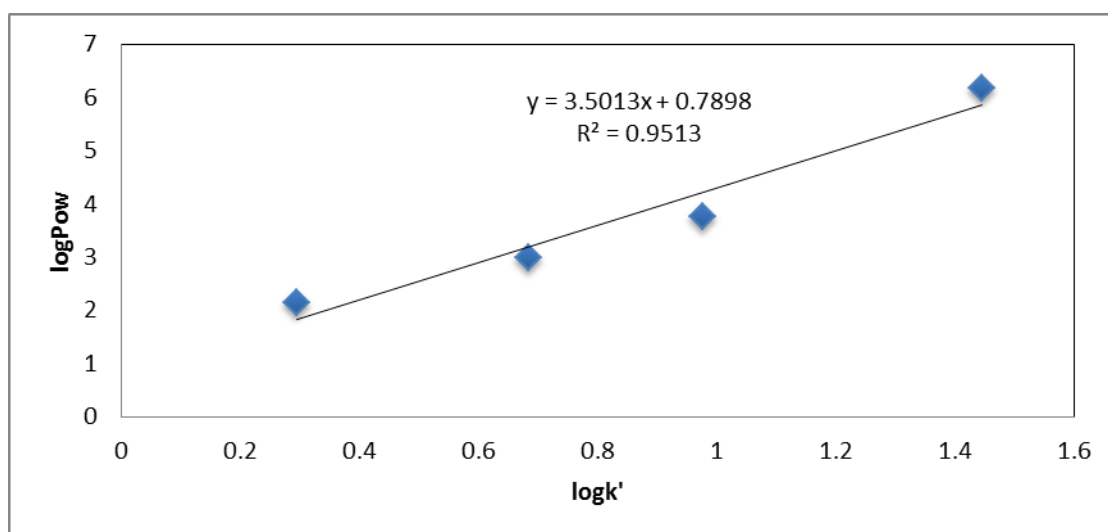

Fig.1 A regression line,  $\log\text{Pow}=3.501k'+0.790$  ( $r=0.951$ ) is obtained from data of table 1.

Some of  $\text{LogP}_{(\text{HPLC})}$  of **EUA(1-5)** are calculated from the measured and calculated data.

Table. 2 Retention Times and  $\log\text{P}(\text{HPLC})$  of BODIPY compounds

|      | $t_0(\text{min})$ | $t_R(\text{min})$ | $k'(t_R-t_0/t_0)(\text{min})$ | $\log k'$ | $\log\text{P}(\text{HPLC})$ |
|------|-------------------|-------------------|-------------------------------|-----------|-----------------------------|
| EUA1 | 3.158             | 116.299           | 36.827                        | 1.566     | 6.273                       |
| EUA2 | 3.867             | 112.753           | 28.158                        | 1.449     | 5.863                       |
| EUA3 | 3.885             | 116.456           | 28.986                        | 1.462     | 5.908                       |
| EUA4 | 3.938             | 111.807           | 27.392                        | 1.438     | 5.824                       |
| EUA5 | 3.981             | 63.909            | 15.054                        | 1.178     | 4.914                       |
|      | (measured)        | (measured)        | (calculated)                  | (calc.)   | (calc.)                     |

#### References:

K. Matsumoto., A. Takeyasu., K. Oizumi., and T. Furubayashi  
 Studies of Novel 1,4-Dihydropyridine Ca Antagonist CS-905. I.  
 Measurement of Partition Coefficient ( $\text{LogP}$ )  
 by High Performance Liquid Chromatography (HPLC)  
 YAKUGAKU ZASSHI 115(3)213-220 (1995)
